# Supplementary material for: Collagen 18 and agrin are secreted by enteric neural crest cells to remodel their microenvironment and regulate their migration during ENS development
Source: Oxford University Press journal article supplement (doi:10.1242/dev.160317), 2018-01-01
Supplement: dev160317supp.pdf [file dev160317supp.pdf]

### Supplementary materials

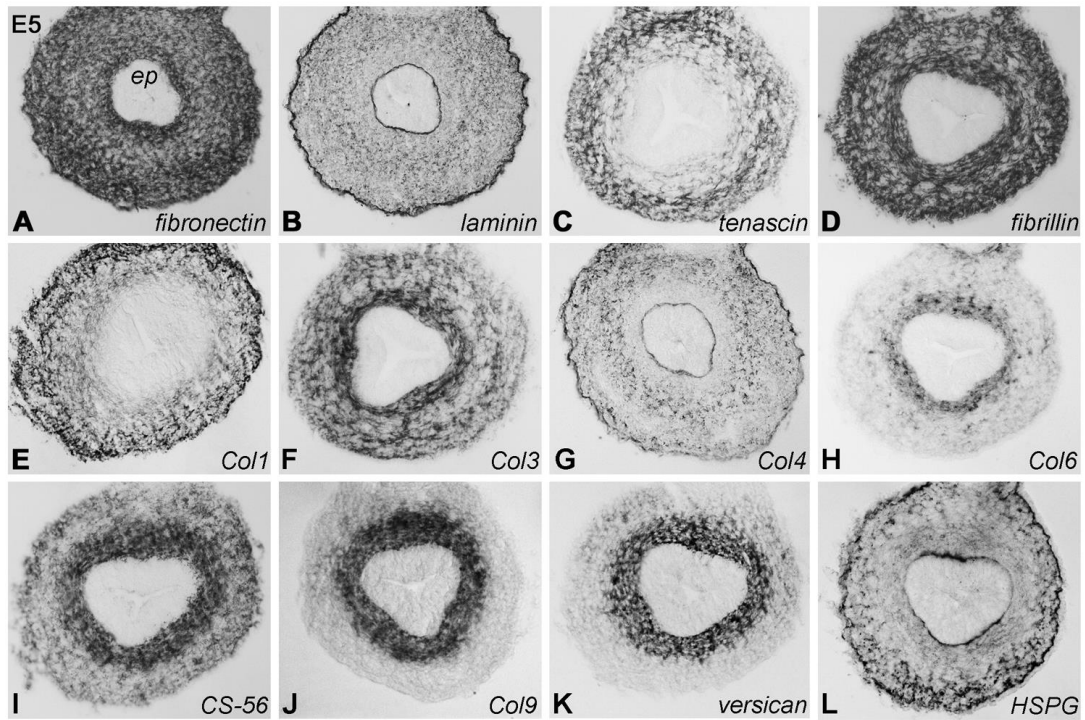

**Figure S1. ECM expression in E5 chick hindgut.** The expression of 12 different ECM proteins was examined in the mid-hindgut of E5 chick embryo.

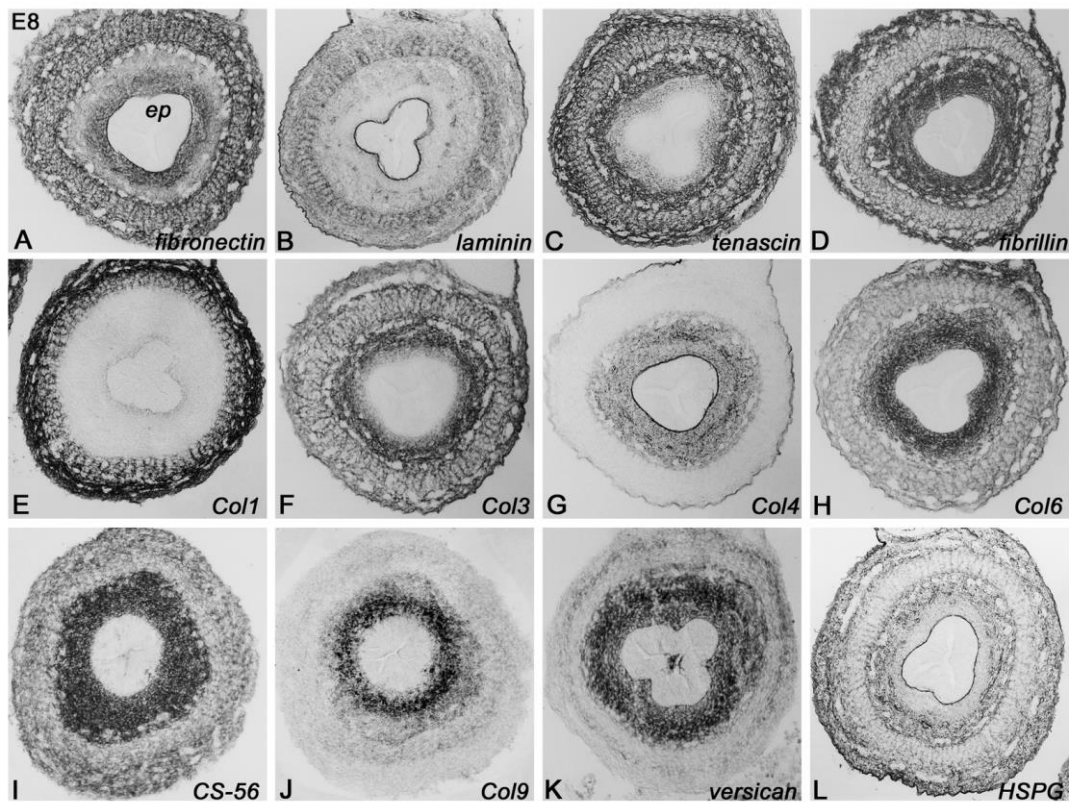

**Figure S2. ECM expression in E8 chick hindgut.** The expression of 12 different ECM proteins was examined in the mid-hindgut of E8 chick embryo.

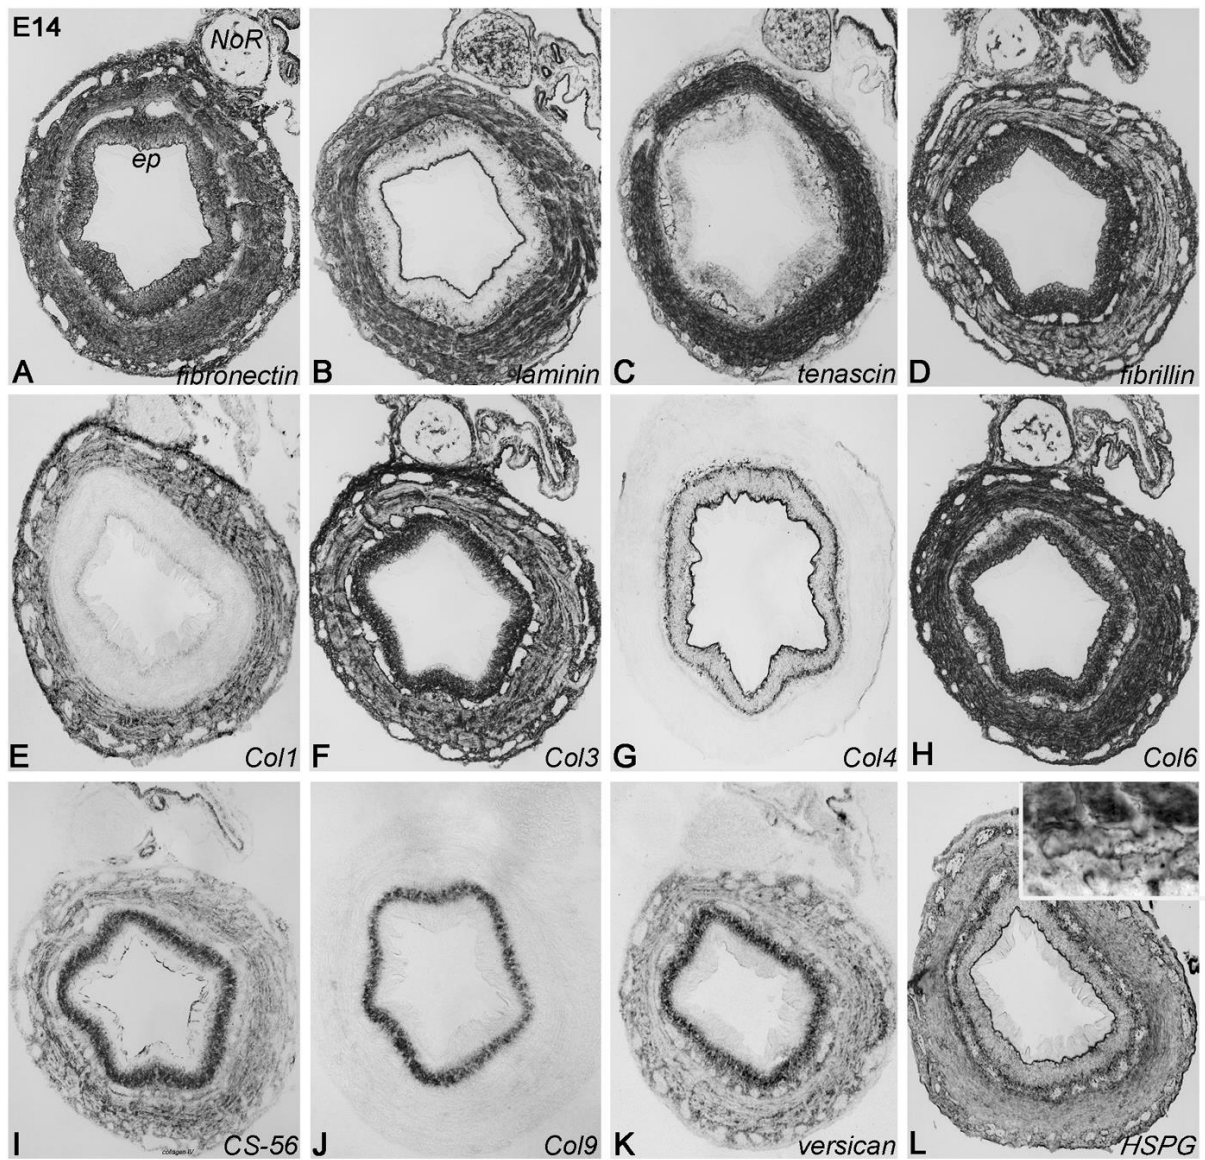

**Figure S3. ECM expression in E14 chick hindgut.** The expression of 12 different ECM proteins was examined in the mid-hindgut of E14 chick embryo.



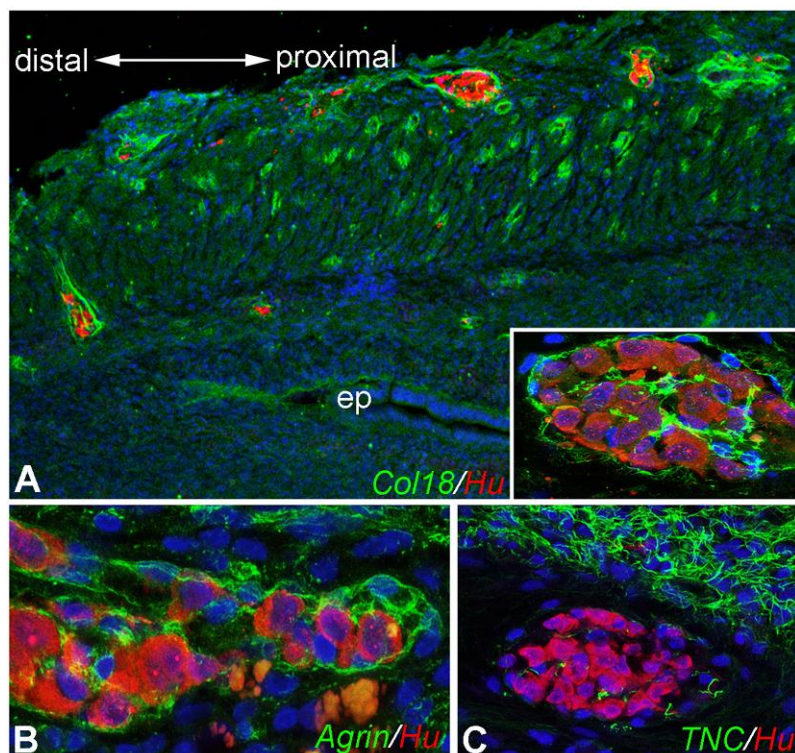

**Figure S4. Sacral neural crest-derived ENCCs express Col18 and agrin.** E5 chick hindgut was explanted, with cloaca and without ceca, onto the chorioallantoic membrane of a host chick to generate hindguts containing only sacral crest-derived ENCCs. The resulting ENS contains scattered Hu<sup>+</sup> enteric ganglia that express Col18 (A) and agrin (B), but not tenascin-C (C).

**Table S1: Primary antibodies.**

| Antibody (clone)       | Host              | Structure/cells identified | Dilution | Source of antibody, catalogue number                            |
|------------------------|-------------------|----------------------------|----------|-----------------------------------------------------------------|
| p75                    | Rabbit polyclonal | Chick ENCDCs               | 1:7000   | Kind gift of Dr. Louis Reichardt, (Weskamp and Reichardt, 1991) |
| p75                    | Rabbit polyclonal | Mouse ENCDCs               | 1:300    | Promega (G3231)                                                 |
| HNK1                   | Mouse IgM         | Chick ENCDCs               | 1:50     | NeoMarkers                                                      |
| Tuj1 (B1195)           | Mouse IgG2a       | Neurons                    | 1:200    | Covance (MMS-435P)                                              |
| HuC/HuD (clone: 16A11) | Mouse IgG2a       | Neurons                    | 1:100    | Invitrogen (A-21271)                                            |

| Antibody (clone)                                       | Host              | Structure/cells identified               | Dilution | Source of antibody, catalogue number                            |
|--------------------------------------------------------|-------------------|------------------------------------------|----------|-----------------------------------------------------------------|
| CN                                                     | Mouse IgG         | chicken-specific neurite marker          | 1:10     | Kind gift of Dr. Hideaki Tanaka, (Tanaka et al., 1990)          |
| Fibronectin (B3/D6)                                    | Mouse IgG2a       | Chick extracellular matrix               | 1:5      | DSHB*                                                           |
| Laminin (31 or 31-2)                                   | Mouse IgG1        | Chick extracellular matrix               | 1:40     | DSHB                                                            |
| Tenascin-C (M1B4)                                      | Mouse IgG1        | Chick extracellular matrix               | 1:10     | DSHB                                                            |
| Fibrillin 2-like (JB3)                                 | Mouse IgG1        | Chick extracellular matrix               | 1:10     | DSHB                                                            |
| Collagen type I (DD4/F12)                              | Mouse IgG2a       | Chick extracellular matrix               | 1:2      | Kind gift of Dr. Thomas F. Linsenmayer, (Birk et al., 1988)     |
| Collagen type III (3B2)                                | Mouse IgG1        | Chick extracellular matrix               | 1:10     | DSHB                                                            |
| Collagen type IV (IF8)                                 | Mouse IgG2a       | Chick extracellular matrix               | 1:2      | Kind gift of Dr. Thomas F. Linsenmayer, (Fitch et al., 1990)    |
| Collagen type VI (39)                                  | Mouse IgG1        | Chick extracellular matrix               | 1:5      | DSHB                                                            |
| Chondroitin sulphate proteoglycan (CS-56)              | Mouse IgM         | glycosaminoglycan portion of native CSPG | 1:2000   | Sigma (C8350)                                                   |
| Collagen type IX (2B9)                                 | Mouse IgM         | Chick extracellular matrix               | 1:2      | DSHB                                                            |
| Versican                                               | Rabbit polyclonal | Extracellular matrix                     | 1:500    | Kind gift of Dr. Maria T. Dours-Zimmermann, (Dutt et al., 2011) |
| Heparan sulfate proteoglycan proteoglycan (33 or 33-2) | Mouse IgG         | Chick extracellular matrix               | 1:5      | DSHB                                                            |
| Collagen type XVIII (6C4)                              | Mouse IgG1        | Chick extracellular matrix               | 1:2      | DSHB                                                            |
| Agrin (6D2)                                            | Mouse IgG1        | Chick extracellular matrix               | 1:5      | DSHB                                                            |
| Perlecan (5C9)                                         | Mouse IgG1        | Chick extracellular matrix               | 1:5      | DSHB                                                            |
| Collagen type XVIII                                    | Rabbit            | Mouse extracellular                      | 1:1000   | Kind gift of Dr.                                                |

| Antibody (clone)                       | Host              | Structure/cells identified                       | Dilution | Source of antibody, catalogue number                        |
|----------------------------------------|-------------------|--------------------------------------------------|----------|-------------------------------------------------------------|
| (NC11)                                 | polyclonal        | matrix                                           |          | Takako Sasaki, (Sasaki et al., 1998)                        |
| Collagen type XVIII (NC1)              | Rabbit polyclonal | Mouse extracellular matrix                       | 1:300    | Kind gift of Dr. Takako Sasaki, (Sasaki et al., 1998)       |
| Endostatin (1092)                      | Rabbit polyclonal | Mouse extracellular matrix                       | 1:100    | Kind gift of Dr. Takako Sasaki, (Sasaki et al., 1998)       |
| Agrin (Mab5204)                        | Mouse IgG1        | Mouse extracellular matrix                       | 1:10     | Millipore                                                   |
| Agrin (AF550)                          | Goat polyclonal   | Mouse extracellular matrix                       | 1:100    | R&D Systems                                                 |
| MEP21 ( $\alpha$ -chicken podocalyxin) | Mouse IgG1        | Chick endothelial cells                          | 1:200    | Kind gift of Dr. Kelly McNagny, (McNagny et al., 1997)      |
| Beta-dystroglycan (43DAG1/8)           | Mouse IgGa        | Receptor for agrin                               | 1:50     | Leica Biosystems                                            |
| Laminin (ab11575)                      | Rabbit polyclonal | Mouse extracellular matrix                       | 1:200    | Abcam                                                       |
| PHOX2B                                 | Guinea pig        | Enteric neural crest cells and glial precursors  | 1:500    | Kind gift of Dr. Hideki Enomoto. (Nagashimada et al., 2012) |
| SOX10 (20B7)                           | Mouse IgG1        | Enteric neural crest cells and neural precursors | 1:50     | ThermoFisher                                                |

\*DSHB (Developmental Studies Hybridoma Bank. Iowa, USA)

### Supplementary references

Birk, D. E., Fitch, J. M., Babiarz, J. P. and Linsenmayer, T. F. (1988). Collagen type I and type V are present in the same fibril in the avian corneal stroma. *J Cell Biol* 106, 999-1008.

Dutt, S., Cassoly, E., Dours-Zimmermann, M. T., Matasci, M., Stoeckli, E. T. and Zimmermann, D. R. (2011). Versican V0 and V1 direct the growth of peripheral axons in the developing chick hindlimb. *J Neurosci* 31, 5262-70.

Fitch, J. M., Birk, D. E., Linsenmayer, C. and Linsenmayer, T. F. (1990). The spatial organization of Descemet's membrane-associated type IV collagen in the avian cornea. *J Cell Biol* 110, 1457-68.

Nagashimada, M., Ohta, H., Li, C., Nakao, K., Uesaka, T., Brunet, J. F., Amiel, J., Trochet, D., Wakayama, T., Enomoto, H. (2012). Autonomic neurocristopathy-associated mutations in PHOX2B dysregulate Sox10 expression. *J Clin Invest.* 122, 3145-3158.

McNagny, K. M., Pettersson, I., Rossi, F., Flamme, I., Shevchenko, A., Mann, M. and Graf, T. (1997). Thrombomucin, a novel cell surface protein that defines thrombocytes and multipotent hematopoietic progenitors. *J Cell Biol* 138, 1395-407.

Sasaki, T., Fukai, N., Mann, K., Gohring, W., Olsen, B. R. and Timpl, R. (1998). Structure, function and tissue forms of the C-terminal globular domain of collagen XVIII containing the angiogenesis inhibitor endostatin. *Embo J* 17, 4249-56.

Tanaka H, Kinutani M, Agata A, Takashima Y, Obata K. (1990). Pathfinding during spinal tract formation in the chick-quail chimera analysed by species-specific monoclonal antibodies. *Development.* 110, 565-571.

Weskamp, G. and Reichardt, L. F. (1991). Evidence that biological activity of NGF is mediated through a novel subclass of high affinity receptors. *Neuron* 6, 649-63.
